# Supplementary material
Source: PubMed Central journal article supplement (PMC5059806)
Supplement: supp_tpc.16.00408_TPC2016-00408-RAR1_Supplemental_Material.pdf [file supp_tpc.16.00408_TPC2016-00408-RAR1_Supplemental_Material.pdf]

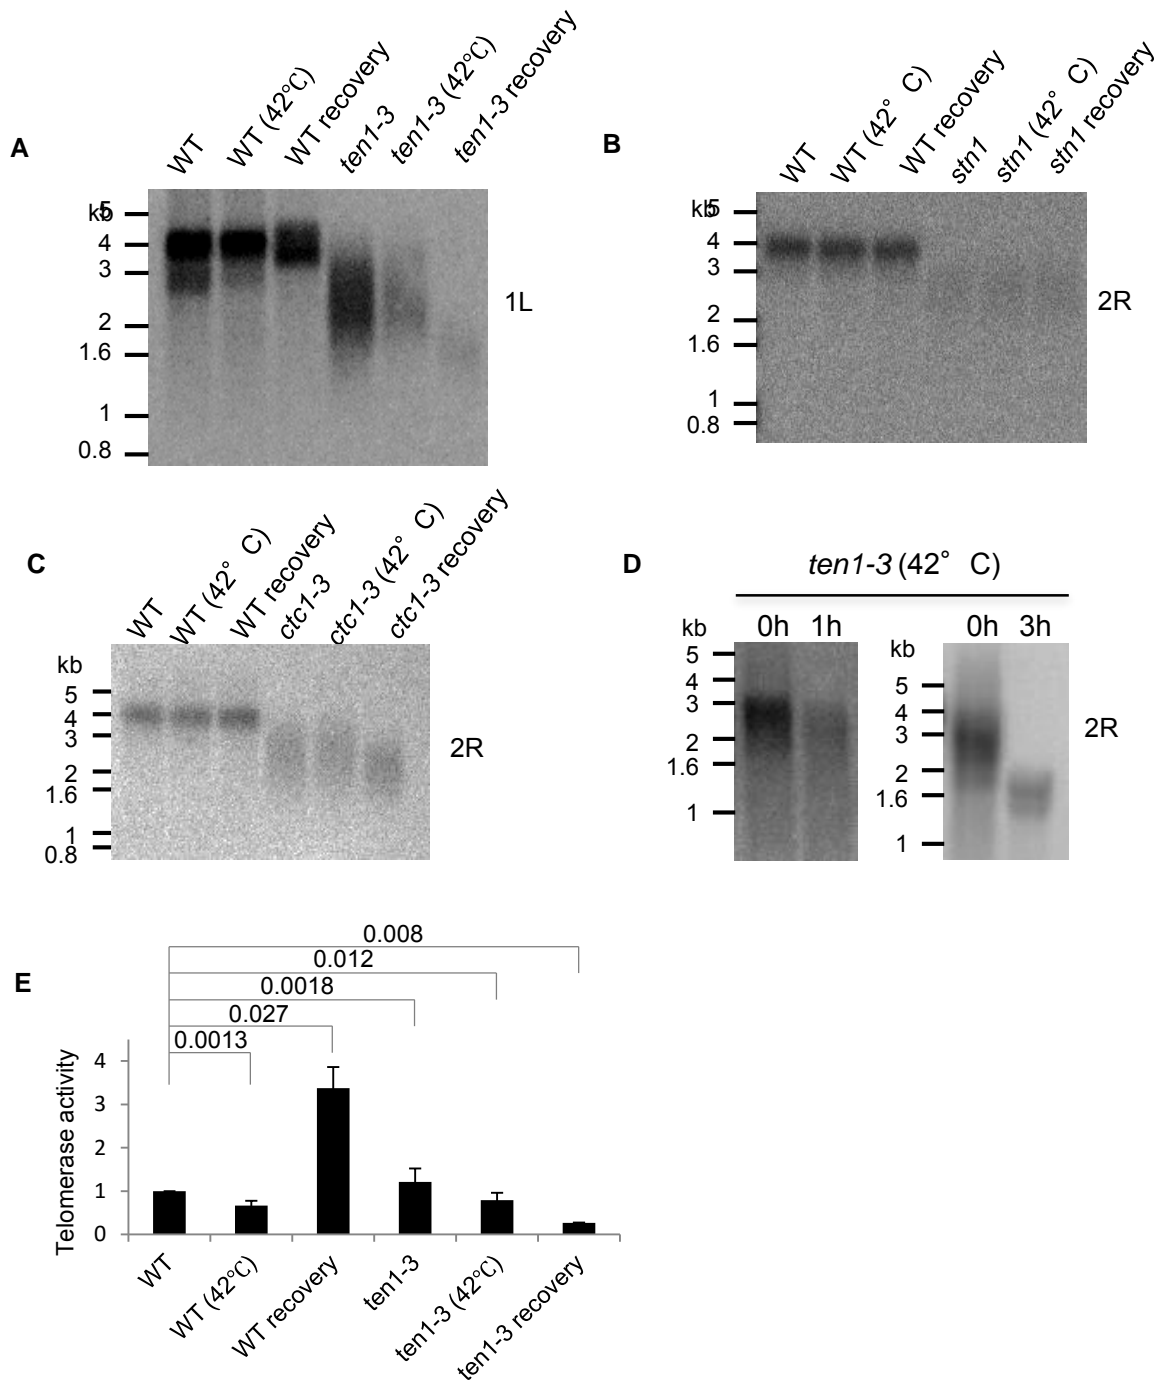

**Supplemental Fig. 1. Heat-induced telomere shortening in *ten1-3* and *ctc1-3* mutants.**

(A-D) PETRA was used to evaluate telomere length following heat shock. 1L and 2R represent individual subtelomeric primers. Blots were hybridized <sup>32</sup>P labeled (TTTAGGG)<sub>5</sub>. (D) PETRA of a time course experiment where DNA was isolated 1 hr or 3 h after heat shock. (E) Telomerase activity in two week-old seedlings measured by Q-TRAP. Data were normalized to WT; each data point represents three biological replicates. *p* values are indicated.

A

MAKSQIEPGVPITLQELYPSSLFYKEGVSLRVTAMLRGYSVETAIGVIED 50  
GGRSLKINTQNI RDVSFRVGSYQFIGELHIEQPNNEAILQARTGRNVDG 100  
IDMNLRYRKTIELLRQFLKEEDNSNMVE 127

AtTEN1

B

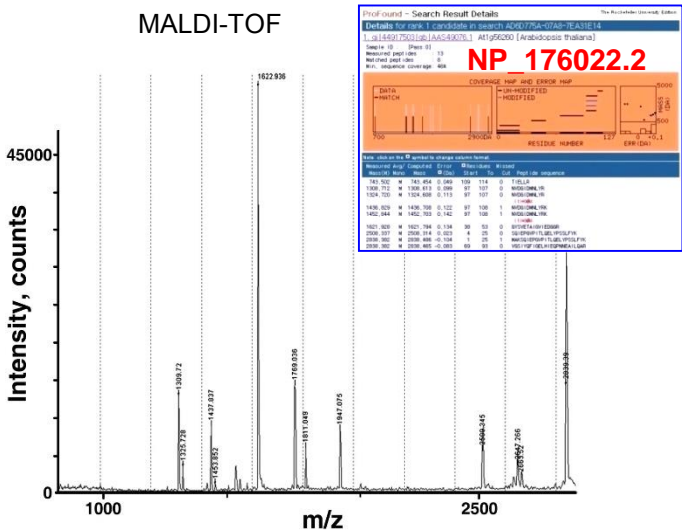

Supplemental Fig. 2. Characterization of AtTEN1 protein.

(A) FoldIndex prediction for AtTEN1. Red indicates a predicted disordered segment in the C-terminus. (B) Mass spectrometry results for purified AtTEN1. Purified protein was subjected to sMALDI-TOF analysis, which identified the protein as AtTEN1.

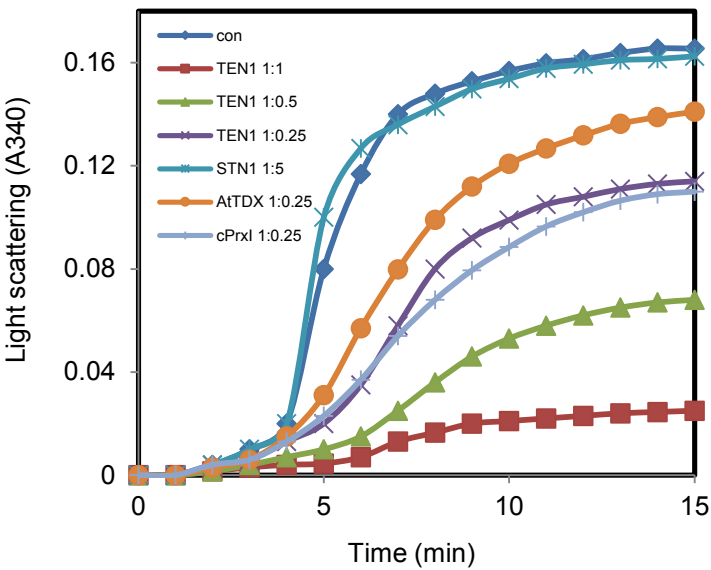

**Supplemental Fig. 3. Chaperone activity of *A. thaliana* TEN1 protein.**

Chaperone activity was measured by using 1.5  $\mu$ M citrate synthase (CS) as a substrate. Thermal-aggregation of the substrate was examined in the presence or absence of AtTEN1 at molar ratios of CS to TEN1 of 1:0.25, 1:0.5 and 1:1 at 43°C. Also shown are data for *A. thaliana* thioredoxin-like chaperone (AtTDX), yeast peroxiredoxin (cPRxl) and a negative control reaction with only CS substrate (con).

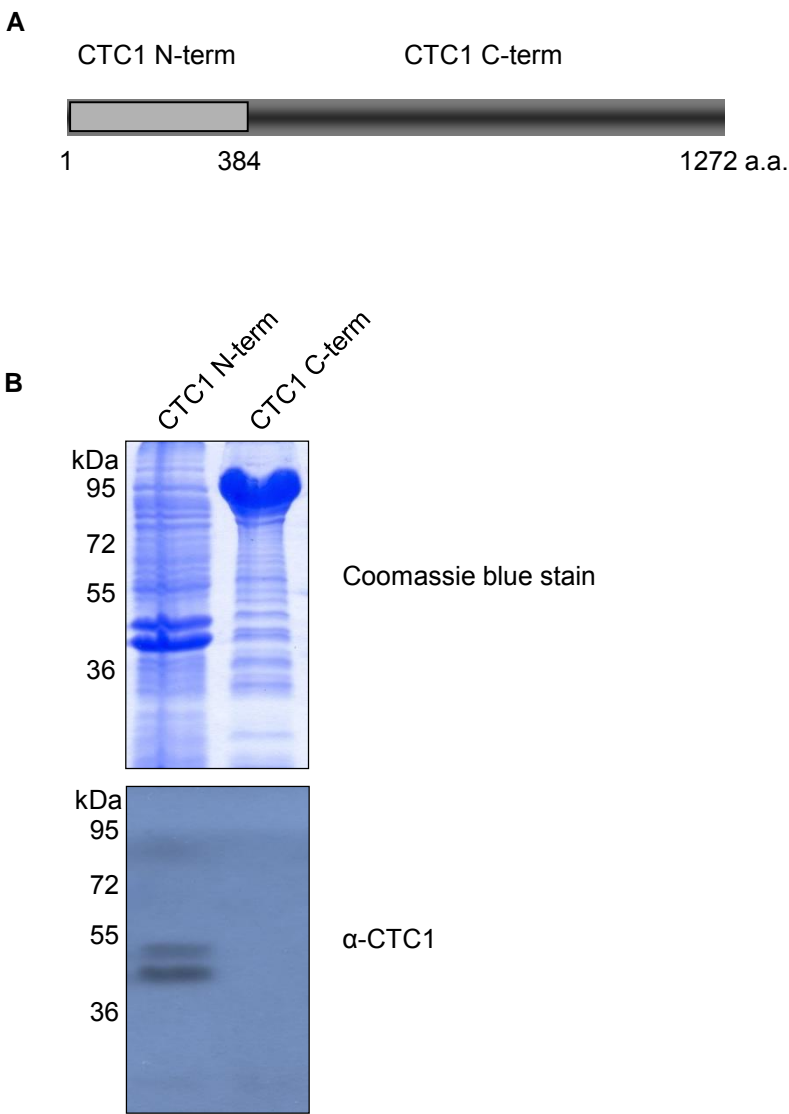

**Supplemental Fig. 4. Specificity of the CTC1 polyclonal antibody.**

(A) Diagram of CTC1 N-term and C-term expression constructs. (B) Immunoblot results for CTC1 N-term and C-term recombinant proteins induced by IPTG in *E. coli* are shown. A Coomassie blue stained loading control is included. Molecular size markers in kDa are on the left. The blot was probed with a polyclonal antibody raised against Arabidopsis CTC1 N-term.

| Name  | Accession No. | Relative expression level after treatment |       |                  |                  |       |       |       |           |       |       |
|-------|---------------|-------------------------------------------|-------|------------------|------------------|-------|-------|-------|-----------|-------|-------|
|       |               | 38°C                                      |       |                  |                  | 4°C   |       |       | Oxidative |       |       |
|       |               | 0.25h                                     | 3h    | 3h + 1h recovery | 3h + 3h recovery | 0.5h  | 3h    | 12h   | 0.5h      | 3h    | 12h   |
| TEN1  | AT1G56260     | 1.306                                     | 2.276 | 1.506            | 1.188            | 1.544 | 1.303 | 1.030 | 1.434     | 1.462 | 1.060 |
| STN1  | AT1G07130     | 0.710                                     | 0.596 | 0.853            | 0.953            | 0.577 | 1.075 | 0.652 | 0.768     | 0.908 | 0.959 |
| CTC1  | AT4G09680     | 1.068                                     | 1.312 | 1.387            | 0.934            | 0.984 | 0.966 | 1.288 | 0.976     | 0.995 | 0.981 |
| TERT  | AT5G16850     | 0.991                                     | 1.131 | 0.946            | 0.992            | 1.003 | 0.962 | 1.135 | 0.871     | 0.968 | 0.890 |
| Ku70  | AT1G16970     | 0.645                                     | 0.415 | 1.319            | 0.835            | 0.655 | 0.564 | 0.541 | 0.581     | 0.540 | 0.573 |
| Ku80  | AT1G48050     | 1.099                                     | 0.399 | 1.133            | 0.903            | 0.961 | 0.793 | 0.665 | 0.976     | 1.007 | 0.925 |
| POT1a | AT2G05210     | 1.687                                     | 1.658 | 1.357            | 1.337            | 1.465 | 1.156 | 0.859 | 1.184     | 1.499 | 1.424 |

**Supplemental Table 1. Transcriptome data for *A. thaliana* telomere-related transcripts in response to abiotic stressors.** Data as reported by Killian et al. 2007 were obtained from the AtGenExpress Visualization Tool using the Affymetrix ATH1 microarray. The untreated basal levels of the mRNAs are set to 1.
